# Supplementary material for: Epidemiology of a SKin Ulceration Disease (SKUD) in the sea cucumber Holothuria scabra with a review on the SKUDs in Holothuroidea (Echinodermata)
Source: PubMed Central journal article supplement (PMC7746772; doi:10.1038/s41598-020-78876-0), 2020-12-17
Supplement: 41598_2020_78876_MOESM1_ESM.pdf [file 41598_2020_78876_MOESM1_ESM.pdf]

**Title: Epidemiology of a SKin Ulceration Disease (SKUD) in the sea cucumber *Holothuria scabra* with a review on the SKUDs in Holothuroidea (Echinodermata)**

Jérôme Delroisse<sup>1,2</sup>, Kévin Van Wayneberghe<sup>1</sup>, Patrick Flammang<sup>1</sup>, David Gillan<sup>3</sup>, Pascal Gerbaux<sup>4</sup>, Noel Opina<sup>5</sup>, Gildas Georges Boleslas Todinanahary<sup>2,5</sup>, Igor Eeckhaut<sup>1,2,5</sup>.

<sup>1</sup> Biology of Marine Organisms and Biomimetics, Research Institute for Biosciences, University of Mons – UMONS, Place du Parc, 6, 7000, Mons, Belgium.

<sup>2</sup> Marine Station of Belaza, Institut Halieutique et des Sciences Marines (IH.SM), University of Toliara, Route du Port Mahavatse II, P.O. Box 141, 601 Toliara, Madagascar

<sup>3</sup> Proteomics and Microbiology Lab, Research Institute for Biosciences, University of Mons – UMONS, Place du Parc, 6, 7000, Mons, Belgium.

<sup>4</sup> Organic Synthesis and Mass Spectrometry Lab, Interdisciplinary Center for Mass Spectrometry, Research Institute for Biosciences, University of Mons – UMONS, Place du Parc, 6, 7000, Mons, Belgium.

<sup>5</sup> Madagascar Holothurie (R&D of Indian Ocean Trepang), Toliara, Route du Port Mahavatse II, P.O. Box 141, 601 Toliara, Madagascar

Correspondence and requests for materials should be addressed to J.D. (email: [Jerome.Delroisse@umons.ac.be](mailto:Jerome.Delroisse@umons.ac.be)) and I.E. (email: [Igor.Eeckhaut@umons.ac.be](mailto:Igor.Eeckhaut@umons.ac.be))

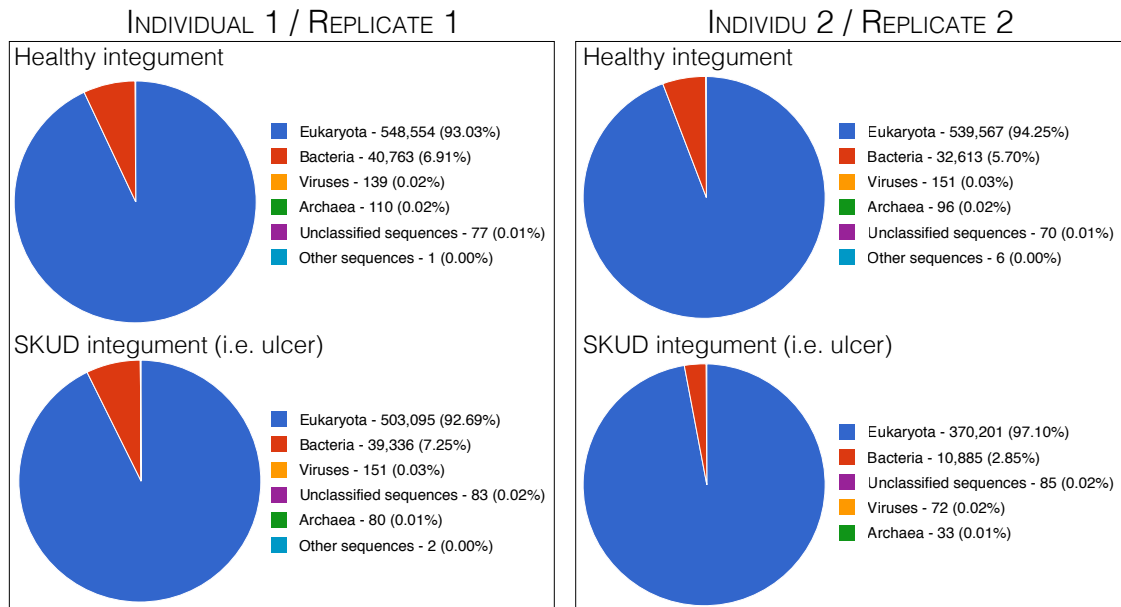

**Supplementary Figure S1:** Proportions of life domains based on RefSeq annotation (MG-rast parameters: e-value threshold:  $>e^{-10}$ , identity threshold:  $>70\%$ , alignment length  $> 15\text{bp}$ , read abundance  $> 1$ , best hits are shown).

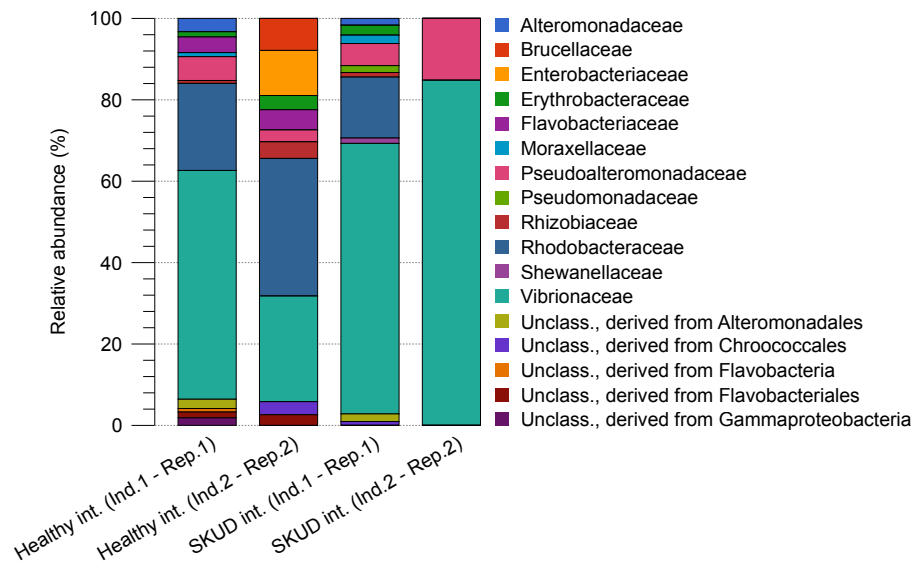

**Supplementary Figure S2:** Proportions of eubacterial families based on RefSeq annotation (MG-rast parameters: e-value threshold:  $>e^{-40}$ , identity threshold:  $>85\%$ , alignment length  $> 15\text{bp}$ , read abundance  $> 5$ , best hits are shown).

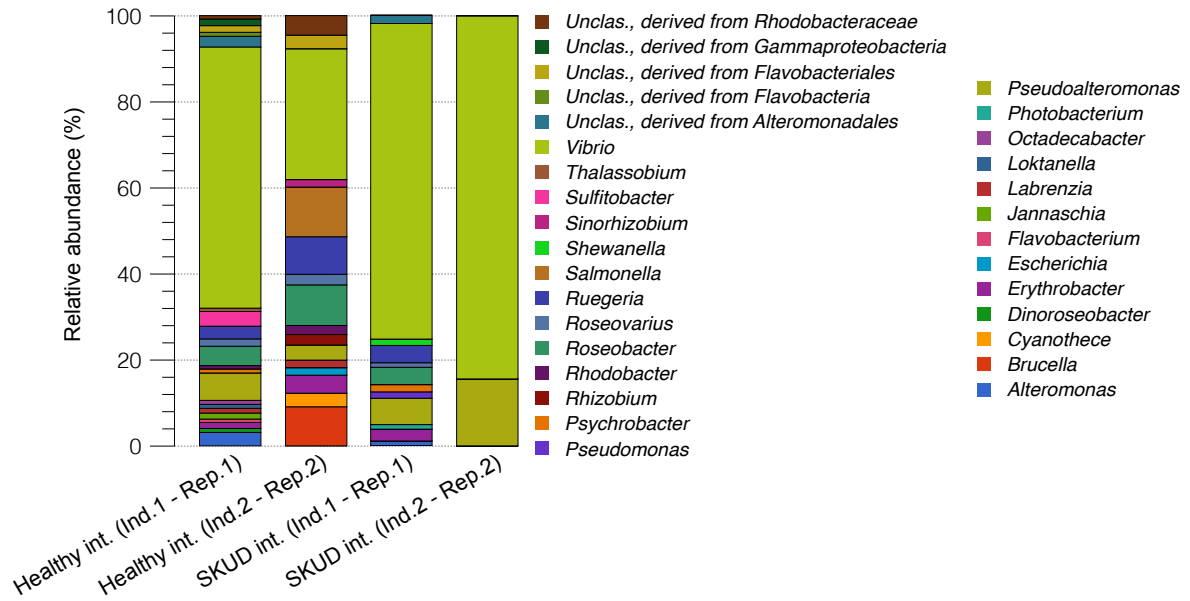

**Supplementary Figure S3:** Proportions of eubacterial genera based on RefSeq annotation (MG-rast parameters: e-value threshold:  $>e^{-40}$ , identity threshold:  $>85\%$ , alignment length  $> 15\text{bp}$ , read abundance  $> 5$ , best hits are shown).

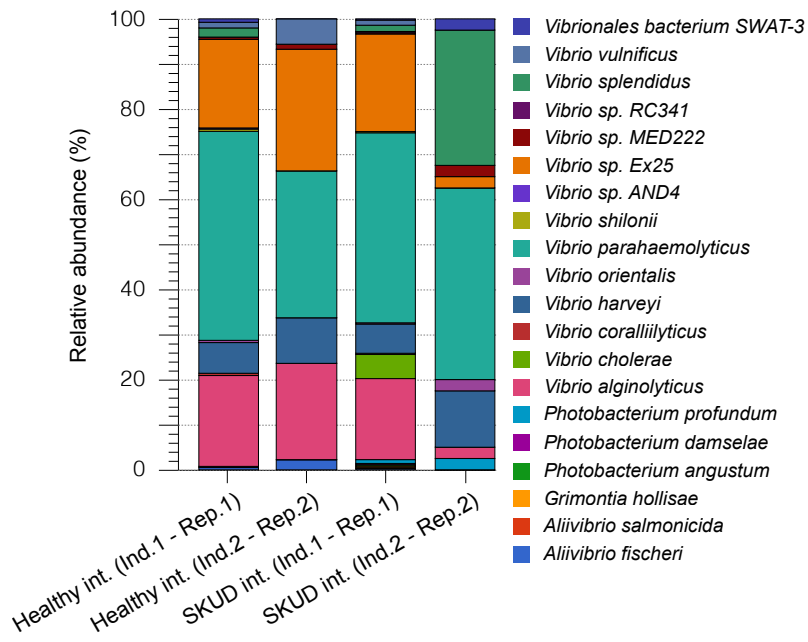

**Supplementary Figure S4:** Proportions of vibriale species based on RefSeq annotation (MG-rast parameters: e-value threshold:  $>e^{-40}$ , identity threshold:  $>85\%$ , alignment length  $> 15\text{bp}$ , read abundancy  $> 1$ , best hits are shown).

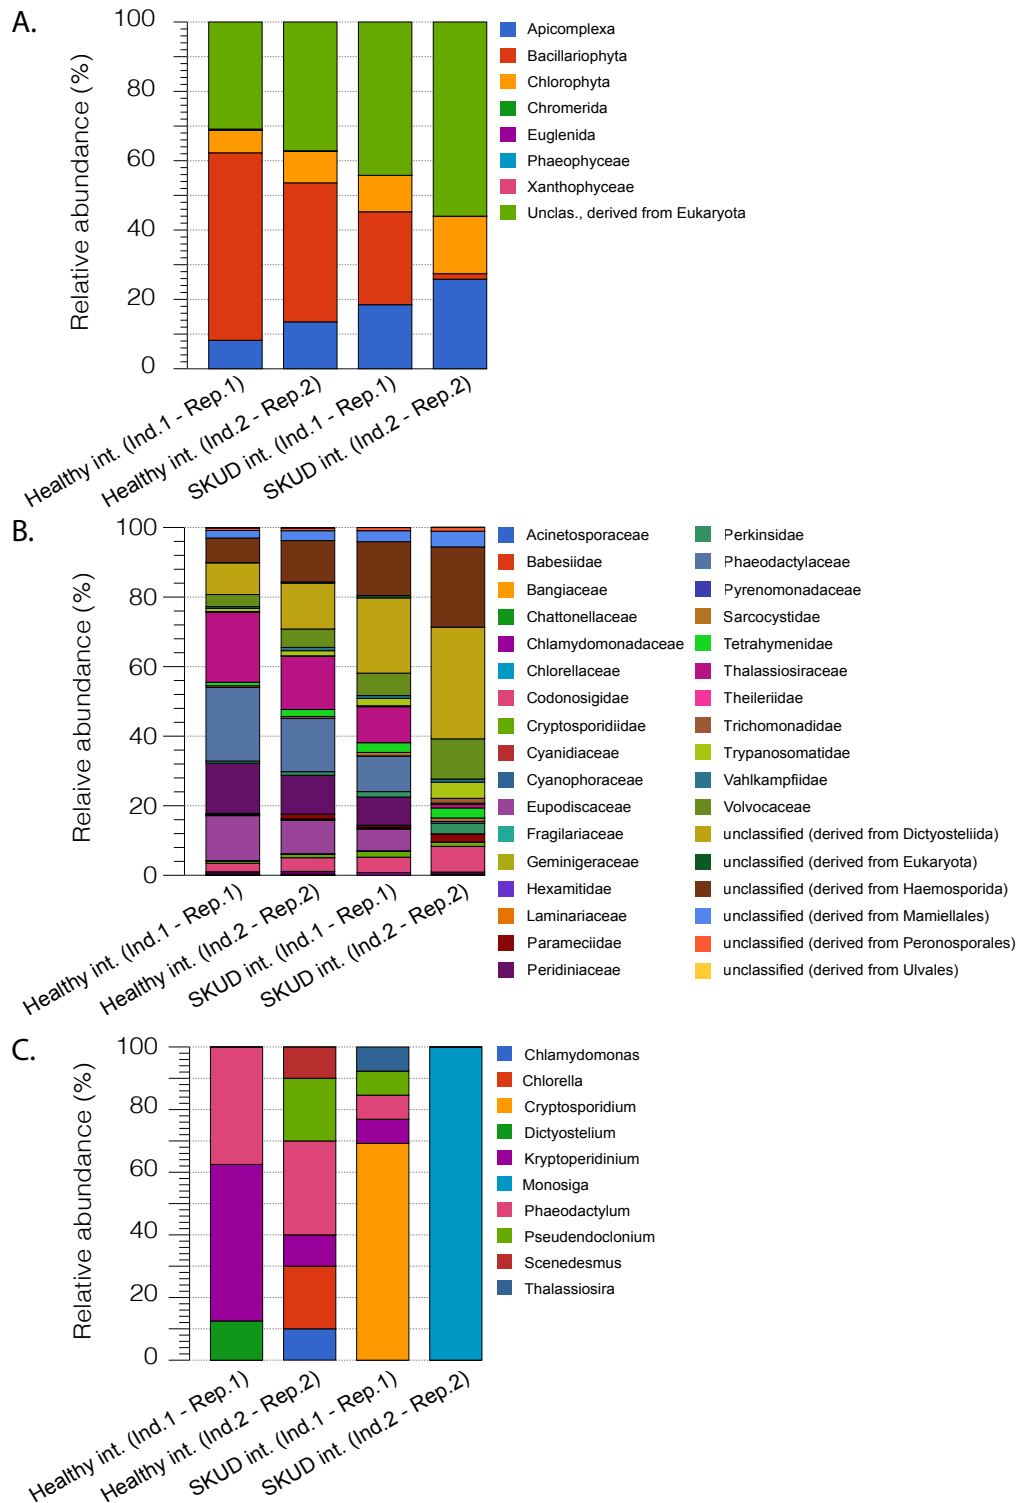

**Supplementary Figure S5:** Proportions of Eukaryota (excluding Metazoa, Fungi and Streptophyta) phyla (A), families (B) and genera (C) based on RefSeq annotation (MG-rast parameters for phyla and families proportions: e-value threshold:  $>e^{-10}$ , identity threshold:  $>70\%$ , alignment length  $> 15\text{bp}$ , read abundance  $> 1$ , best hits are shown; MG-rast parameters for genera proportion: e-value threshold:  $>e^{-40}$ , identity threshold:  $>85\%$ , alignment length  $> 15\text{bp}$ , read abundance  $> 1$ , best hits are shown).

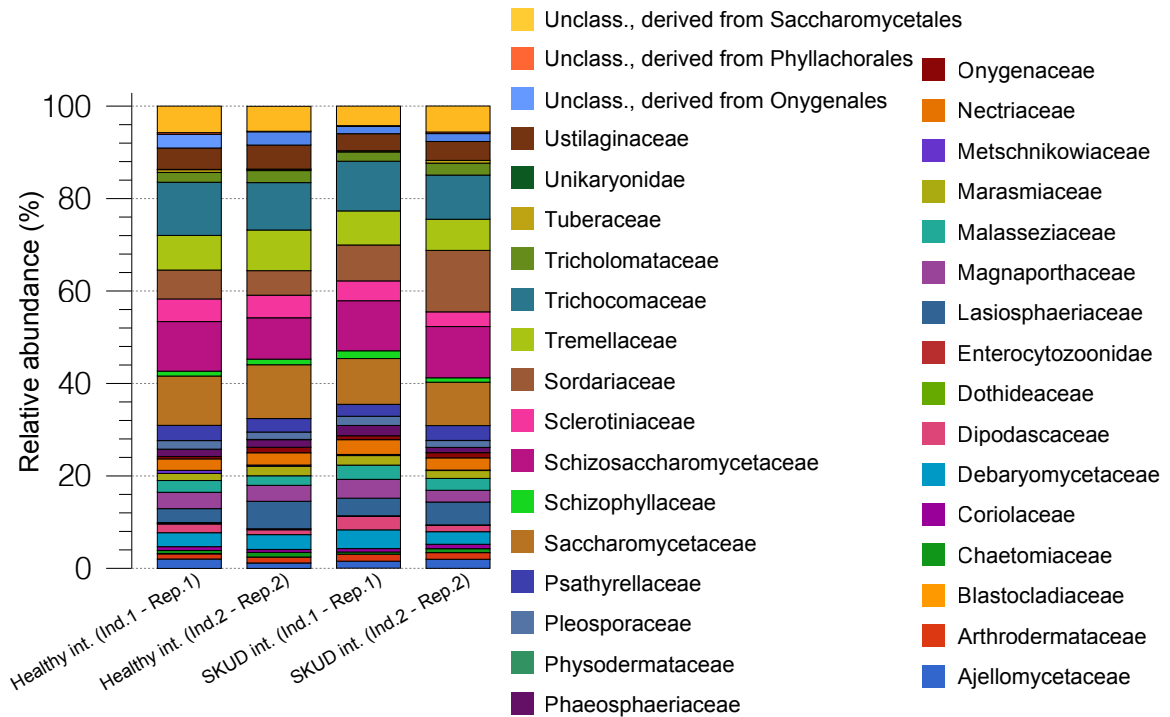

**Supplementary Figure S6:** Proportions of Fungi families based on RefSeq annotation (MG-rast parameters: e-value threshold:  $>e^{-10}$ , identity threshold:  $>70\%$ , alignment length  $>15\text{bp}$ , read abundance  $>1$ , best hits are shown).

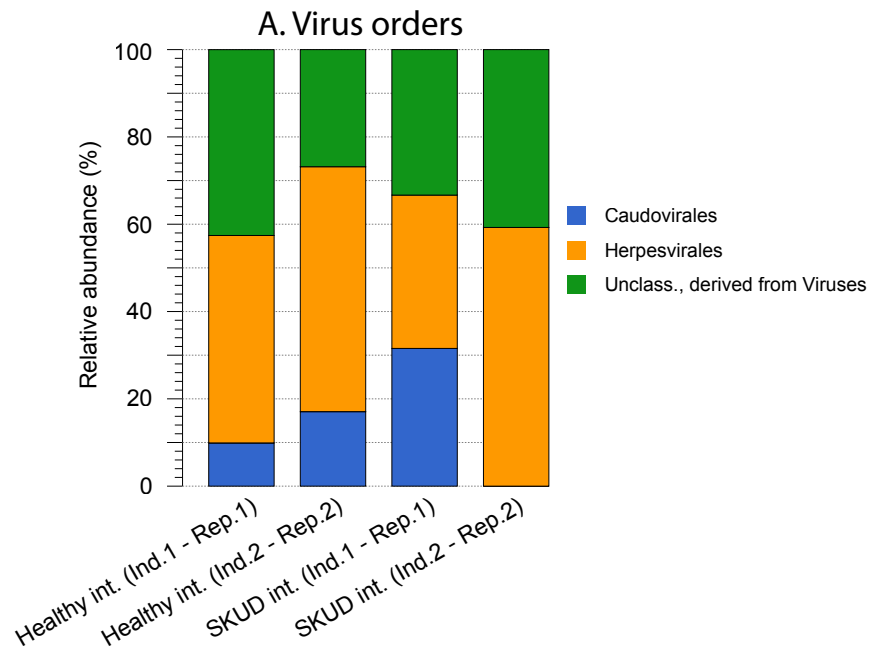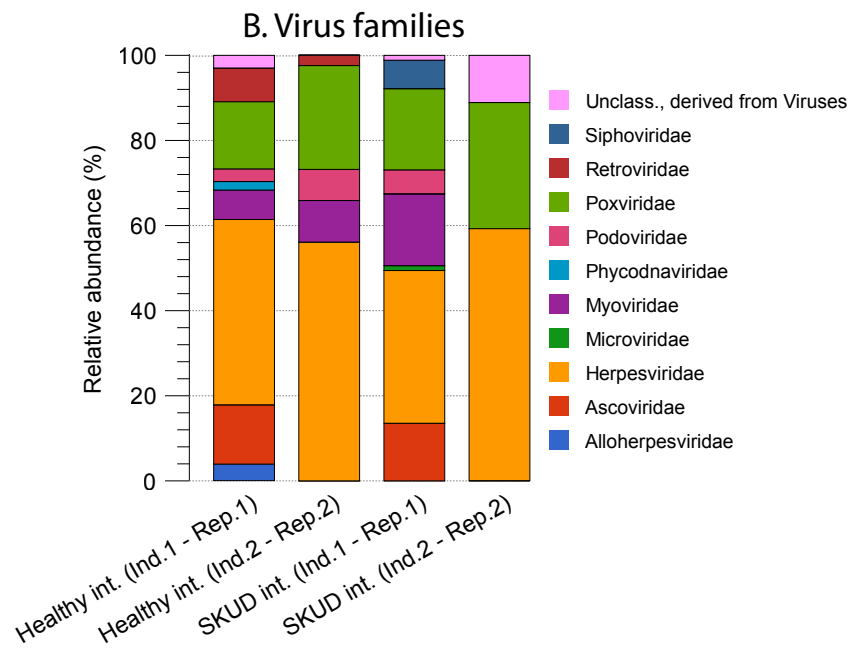

**Supplementary Figure S7:** Proportions of Virus orders and families based on RefSeq annotation (MG-rast parameters: e-value threshold:  $>e^{-10}$ , identity threshold:  $>70\%$ , alignment length  $> 15\text{bp}$ , read abundance  $> 1$ , best hits are shown).



| BLASTn query | Description                                 | Accession |
|--------------|---------------------------------------------|-----------|
| Query        | <i>Vibrio</i> sp. SKUD-MD-20 C1 (culture 1) | MT416091  |

  

| BLASTn output | Description                                                                         | Max Score | Total Score | Query Cover | E value   | Per. Ident | Accession  |
|---------------|-------------------------------------------------------------------------------------|-----------|-------------|-------------|-----------|------------|------------|
| 1             | <i>Vibrio alginolyticus</i> strain YWT7-80 16S ribosomal RNA gene, partial sequence | 625       | 625         | 100%        | 5,00E-175 | 99.42%     | MT368033.1 |
| 2             | <i>Vibrio alginolyticus</i> strain YWO6-72 16S ribosomal RNA gene, partial sequence | 625       | 625         | 100%        | 5,00E-175 | 99.42%     | MT368030.1 |
| 3             | <i>Vibrio alginolyticus</i> strain YWT6-68 16S ribosomal RNA gene, partial sequence | 625       | 625         | 100%        | 5,00E-175 | 99.42%     | MT368029.1 |
| 4             | <i>Vibrio alginolyticus</i> strain YWO3-29 16S ribosomal RNA gene, partial sequence | 625       | 625         | 100%        | 5,00E-175 | 99.42%     | MT368021.1 |
| 5             | <i>Vibrio alginolyticus</i> strain YWO3-27 16S ribosomal RNA gene, partial sequence | 625       | 625         | 100%        | 5,00E-175 | 99.42%     | MT368020.1 |
| 6             | <i>Vibrio alginolyticus</i> strain YPL2-20 16S ribosomal RNA gene, partial sequence | 625       | 625         | 100%        | 5,00E-175 | 99.42%     | MT368017.1 |
| 7             | <i>Vibrio</i> sp. strain BC76 16S ribosomal RNA gene, partial sequence              | 625       | 625         | 100%        | 5,00E-175 | 99.42%     | MT325889.1 |
| 8             | <i>Vibrio neocaledonicus</i> strain BC43 16S ribosomal RNA gene, partial sequence   | 625       | 625         | 100%        | 5,00E-175 | 99.42%     | MT325882.1 |
| 9             | <i>Vibrio neocaledonicus</i> strain BC41 16S ribosomal RNA gene, partial sequence   | 625       | 625         | 100%        | 5,00E-175 | 99.42%     | MT325880.1 |
| 10            | <i>Vibrio</i> sp. strain BC37 16S ribosomal RNA gene, partial sequence              | 625       | 625         | 100%        | 5,00E-175 | 99.42%     | MT325879.1 |

  

| BLASTn query | Description                            | Accession |
|--------------|----------------------------------------|-----------|
| Query        | <i>Vibrio variabilis</i> SKUD-MD-20 C2 | MT416092  |

  

| BLASTn output | Description                                                                        | Max Score | Total Score | Query Cover | E value   | Per. Ident | Accession  |
|---------------|------------------------------------------------------------------------------------|-----------|-------------|-------------|-----------|------------|------------|
| 1             | <i>Vibrio variabilis</i> strain T01 16S ribosomal RNA gene, partial sequence       | 619       | 619         | 100%        | 2,00E-173 | 99.13%     | KP329555.1 |
| 2             | Uncultured bacterium clone GXTJ5A301A0EAG 16S ribosomal RNA gene, partial sequence | 619       | 619         | 100%        | 2,00E-173 | 99.13%     | KF331146.1 |
| 3             | Uncultured bacterium clone GXTJ5A301B2LBJ 16S ribosomal RNA gene, partial sequence | 619       | 619         | 100%        | 2,00E-173 | 99.13%     | KF330715.1 |
| 4             | Uncultured bacterium clone GXTJ5A301A9XNS 16S ribosomal RNA gene, partial sequence | 619       | 619         | 100%        | 2,00E-173 | 99.13%     | KF330671.1 |
| 5             | Bacterium 3H301 16S ribosomal RNA gene, partial sequence                           | 616       | 616         | 100%        | 3,00E-172 | 98.84%     | JF411542.1 |
| 6             | <i>Vibrio</i> sp. strain MW-23 16S ribosomal RNA gene, partial sequence            | 614       | 614         | 100%        | 1,00E-171 | 98.84%     | MG686115.1 |
| 7             | Uncultured bacterium clone GXTJ5A301B87K 16S ribosomal RNA gene, partial sequence  | 614       | 614         | 100%        | 1,00E-171 | 98.84%     | KF332760.1 |
| 8             | <i>Vibrio sinaloensis</i> strain F5C1 16S ribosomal RNA gene, partial sequence     | 614       | 614         | 100%        | 1,00E-171 | 98.84%     | JX999951.1 |
| 9             | Uncultured bacterium clone GXTJ5A301AMXZ 16S ribosomal RNA gene, partial sequence  | 612       | 612         | 100%        | 4,00E-171 | 98.84%     | KF333857.1 |
| 10            | Uncultured bacterium clone GXTJ5A301BXNPN 16S ribosomal RNA gene, partial sequence | 612       | 612         | 100%        | 4,00E-171 | 98.84%     | KF333347.1 |

  

| BLASTn query | Description                                  | Accession |
|--------------|----------------------------------------------|-----------|
| Query        | <i>Vibrio parahaemolyticus</i> SKUD-MD-20 C3 | MT416093  |

  

| BLASTn output | Description                                                                          | Max Score | Total Score | Query Cover | E value   | Per. Ident | Accession  |
|---------------|--------------------------------------------------------------------------------------|-----------|-------------|-------------|-----------|------------|------------|
| 1             | <i>Vibrio parahaemolyticus</i> strain TY-49 16S ribosomal RNA gene, partial sequence | 608       | 608         | 100%        | 5,00E-170 | 98.55%     | MN960078.1 |
| 2             | <i>Vibrio alginolyticus</i> strain JK158 16S ribosomal RNA gene, partial sequence    | 608       | 608         | 100%        | 5,00E-170 | 98.55%     | MK696466.1 |
| 3             | <i>Vibrio alginolyticus</i> strain JK140 16S ribosomal RNA gene, partial sequence    | 608       | 608         | 100%        | 5,00E-170 | 98.55%     | MK696461.1 |
| 4             | <i>Vibrio</i> sp. strain 201707CJKOP-Y194 16S ribosomal RNA gene, partial sequence   | 608       | 608         | 100%        | 5,00E-170 | 98.55%     | MG593758.1 |
| 5             | <i>Vibrio</i> sp. strain 201707CJKOP-25 16S ribosomal RNA gene, partial sequence     | 608       | 608         | 100%        | 5,00E-170 | 98.55%     | MG309461.1 |
| 6             | <i>Vibrio</i> sp. strain 24/486Kan 16S ribosomal RNA gene, partial sequence          | 608       | 608         | 100%        | 5,00E-170 | 98.55%     | MK512027.1 |
| 7             | <i>Vibrio alginolyticus</i> strain FDAARGOS_108 chromosome 1, complete sequence      | 608       | 7054        | 100%        | 5,00E-170 | 98.55%     | CP014053.1 |
| 8             | <i>Vibrio</i> sp. strain pSSB-01 16S ribosomal RNA gene, partial sequence            | 608       | 608         | 100%        | 5,00E-170 | 98.55%     | MH315831.1 |
| 9             | <i>Vibrio parahaemolyticus</i> strain Vp-D9 16S ribosomal RNA gene, partial sequence | 608       | 608         | 100%        | 5,00E-170 | 98.55%     | MH298547.1 |
| 10            | <i>Vibrio parahaemolyticus</i> strain msr11 16S ribosomal RNA gene, partial sequence | 608       | 608         | 100%        | 5,00E-170 | 98.55%     | MH244245.1 |

**Supplementary Table S3: BLAST analysis results of 16S ribosomal RNA gene obtained from isolated cultured bacteria.**
